# Supplementary material for: Identification of a Hypoxia-Related lncRNA Biomarker Signature for Head and Neck Squamous Cell Carcinoma
Source: Hindawi journal article supplement (doi:10.1155/2022/6775496), 2022-01-19
Supplement: f1 [file 6775496.f1.pdf]

Supplementary Table 1 The list of hypoxia-related genes.

| Original Member | NCBI (Entrez) Gene Id | Gene Symbol |
|-----------------|-----------------------|-------------|
| ADM             | 133                   | ADM         |
| ADORA2B         | 136                   | ADORA2B     |
| AK4             | 205                   | AK4         |
| AKAP12          | 9590                  | AKAP12      |
| ALDOA           | 226                   | ALDOA       |
| ALDOB           | 229                   | ALDOB       |
| ALDOC           | 230                   | ALDOC       |
| AMPD3           | 272                   | AMPD3       |
| ANGPTL4         | 51129                 | ANGPTL4     |
| ANKZF1          | 55139                 | ANKZF1      |
| ANXA2           | 302                   | ANXA2       |
| ATF3            | 467                   | ATF3        |
| ATP7A           | 538                   | ATP7A       |
| B3GALT6         | 126792                | B3GALT6     |
| B4GALNT2        | 124872                | B4GALNT2    |
| BCAN            | 63827                 | BCAN        |
| BCL2            | 596                   | BCL2        |
| BGN             | 633                   | BGN         |
| BHLHE40         | 8553                  | BHLHE40     |
| BNIP3L          | 665                   | BNIP3L      |
| BRS3            | 680                   | BRS3        |
| BTG1            | 694                   | BTG1        |
| CA12            | 771                   | CA12        |
| CASP6           | 839                   | CASP6       |
| CAV1            | 857                   | CAV1        |
| CCNG2           | 901                   | CCNG2       |
| CCRN4L          | 25819                 | NOCT        |
| CDKN1A          | 1026                  | CDKN1A      |
| CDKN1B          | 1027                  | CDKN1B      |
| CDKN1C          | 1028                  | CDKN1C      |
| CHST2           | 9435                  | CHST2       |
| CHST3           | 9469                  | CHST3       |
| CITED2          | 10370                 | CITED2      |
| COL5A1          | 1289                  | COL5A1      |
| CP              | 1356                  | CP          |
| CSRP2           | 1466                  | CSRP2       |
| CTGF            | 1490                  | CCN2        |
| CXCR4           | 7852                  | CXCR4       |
| CXCR7           | 57007                 | ACKR3       |
| CYR61           | 3491                  | CCN1        |
| DCN             | 1634                  | DCN         |

|         |       |         |
|---------|-------|---------|
| DDIT3   | 1649  | DDIT3   |
| DDIT4   | 54541 | DDIT4   |
| DPYSL4  | 10570 | DPYSL4  |
| DTNA    | 1837  | DTNA    |
| DUSP1   | 1843  | DUSP1   |
| EDN2    | 1907  | EDN2    |
| EFNA1   | 1942  | EFNA1   |
| EFNA3   | 1944  | EFNA3   |
| EGFR    | 1956  | EGFR    |
| ENO1    | 2023  | ENO1    |
| ENO2    | 2026  | ENO2    |
| ENO3    | 2027  | ENO3    |
| ERO1L   | 30001 | ERO1A   |
| ERRFI1  | 54206 | ERRFI1  |
| ETS1    | 2113  | ETS1    |
| EXT1    | 2131  | EXT1    |
| F3      | 2152  | F3      |
| FAM162A | 26355 | FAM162A |
| FBP1    | 2203  | FBP1    |
| FOS     | 2353  | FOS     |
| FOSL2   | 2355  | FOSL2   |
| FOXO3   | 2309  | FOXO3   |
| GAA     | 2548  | GAA     |
| GALK1   | 2584  | GALK1   |
| GAPDH   | 2597  | GAPDH   |
| GAPDHS  | 26330 | GAPDHS  |
| GBE1    | 2632  | GBE1    |
| GCK     | 2645  | GCK     |
| GCNT2   | 2651  | GCNT2   |
| GLRX    | 2745  | GLRX    |
| GPC1    | 2817  | GPC1    |
| GPC3    | 2719  | GPC3    |
| GPC4    | 2239  | GPC4    |
| GPI     | 2821  | GPI     |
| GRHPR   | 9380  | GRHPR   |
| GYS1    | 2997  | GYS1    |
| HAS1    | 3036  | HAS1    |
| HDLBP   | 3069  | HDLBP   |
| HEXA    | 3073  | HEXA    |
| HK1     | 3098  | HK1     |
| HK2     | 3099  | HK2     |
| HMOX1   | 3162  | HMOX1   |
| HOXB9   | 3219  | HOXB9   |

|        |       |        |
|--------|-------|--------|
| HS3ST1 | 9957  | HS3ST1 |
| HSPA5  | 3309  | HSPA5  |
| IDS    | 3423  | IDS    |
| IER3   | 8870  | IER3   |
| IGFBP1 | 3484  | IGFBP1 |
| IGFBP3 | 3486  | IGFBP3 |
| IL6    | 3569  | IL6    |
| ILVBL  | 10994 | ILVBL  |
| INHA   | 3623  | INHA   |
| IRS2   | 8660  | IRS2   |
| ISG20  | 3669  | ISG20  |
| JMJD6  | 23210 | JMJD6  |
| JUN    | 3725  | JUN    |
| KDEL3  | 11015 | KDEL3  |
| KDM3A  | 55818 | KDM3A  |
| KIF5A  | 3798  | KIF5A  |
| KLF6   | 1316  | KLF6   |
| KLF7   | 8609  | KLF7   |
| KLHL24 | 54800 | KLHL24 |
| LALBA  | 3906  | LALBA  |
| LARGE  | 9215  | LARGE1 |
| LDHA   | 3939  | LDHA   |
| LDHC   | 3948  | LDHC   |
| LOX    | 4015  | LOX    |
| LXN    | 56925 | LXN    |
| MAFF   | 23764 | MAFF   |
| MAP3K1 | 4214  | MAP3K1 |
| MIF    | 4282  | MIF    |
| MT1E   | 4493  | MT1E   |
| MT2A   | 4502  | MT2A   |
| MXI1   | 4601  | MXI1   |
| MYH9   | 4627  | MYH9   |
| NAGK   | 55577 | NAGK   |
| NCAN   | 1463  | NCAN   |
| NDRG1  | 10397 | NDRG1  |
| NDST1  | 3340  | NDST1  |
| NDST2  | 8509  | NDST2  |
| NEDD4L | 23327 | NEDD4L |
| NFIL3  | 4783  | NFIL3  |
| NR3C1  | 2908  | NR3C1  |
| P4HA1  | 5033  | P4HA1  |
| P4HA2  | 8974  | P4HA2  |
| PAM    | 5066  | PAM    |

|          |        |          |
|----------|--------|----------|
| PCK1     | 5105   | PCK1     |
| PDGFB    | 5155   | PDGFB    |
| PDK1     | 5163   | PDK1     |
| PDK3     | 5165   | PDK3     |
| PFKFB3   | 5209   | PFKFB3   |
| PFKL     | 5211   | PFKL     |
| PFKP     | 5214   | PFKP     |
| PGAM2    | 5224   | PGAM2    |
| PGF      | 5228   | PGF      |
| PGK1     | 5230   | PGK1     |
| PGM1     | 5236   | PGM1     |
| PGM2     | 55276  | PGM2     |
| PHKG1    | 5260   | PHKG1    |
| PIM1     | 5292   | PIM1     |
| PKLR     | 5313   | PKLR     |
| PKP1     | 5317   | PKP1     |
| PLAC8    | 51316  | PLAC8    |
| PLAUR    | 5329   | PLAUR    |
| PLIN2    | 123    | PLIN2    |
| PNRC1    | 10957  | PNRC1    |
| PPARGC1A | 10891  | PPARGC1A |
| PPFIA4   | 8497   | PPFIA4   |
| PPP1R15A | 23645  | PPP1R15A |
| PPP1R3C  | 5507   | PPP1R3C  |
| PRDX5    | 25824  | PRDX5    |
| PRKCA    | 5578   | PRKCA    |
| PRKCDBP  | 112464 | CAVIN3   |
| PTRF     | 284119 | CAVIN1   |
| PYGM     | 5837   | PYGM     |
| RBPJ     | 3516   | RBPJ     |
| RORA     | 6095   | RORA     |
| RRAGD    | 58528  | RRAGD    |
| S100A4   | 6275   | S100A4   |
| SAP30    | 8819   | SAP30    |
| SCARB1   | 949    | SCARB1   |
| SDC2     | 6383   | SDC2     |
| SDC3     | 9672   | SDC3     |
| SDC4     | 6385   | SDC4     |
| SELENBP1 | 8991   | SELENBP1 |
| SERPINE1 | 5054   | SERPINE1 |
| SIAH2    | 6478   | SIAH2    |
| SLC25A1  | 6576   | SLC25A1  |
| SLC2A1   | 6513   | SLC2A1   |

|         |       |         |
|---------|-------|---------|
| SLC2A3  | 6515  | SLC2A3  |
| SLC2A5  | 6518  | SLC2A5  |
| SLC37A4 | 2542  | SLC37A4 |
| SLC6A6  | 6533  | SLC6A6  |
| SRPX    | 8406  | SRPX    |
| STBD1   | 8987  | STBD1   |
| STC1    | 6781  | STC1    |
| STC2    | 8614  | STC2    |
| SULT2B1 | 6820  | SULT2B1 |
| TES     | 26136 | TES     |
| TGFB3   | 7043  | TGFB3   |
| TGFBI   | 7045  | TGFBI   |
| TGM2    | 7052  | TGM2    |
| TIPARP  | 25976 | TIPARP  |
| TKTL1   | 8277  | TKTL1   |
| TMEM45A | 55076 | TMEM45A |
| TNFAIP3 | 7128  | TNFAIP3 |
| TPBG    | 7162  | TPBG    |
| TPD52   | 7163  | TPD52   |
| TPI1    | 7167  | TPI1    |
| TPST2   | 8459  | TPST2   |
| UGP2    | 7360  | UGP2    |
| VEGFA   | 7422  | VEGFA   |
| VHL     | 7428  | VHL     |
| VLDLR   | 7436  | VLDLR   |
| WISP2   | 8839  | CCN5    |
| WSB1    | 26118 | WSB1    |
| XPNPEP1 | 7511  | XPNPEP1 |
| ZFP36   | 7538  | ZFP36   |
| ZNF292  | 23036 | ZNF292  |
